# Supplementary material for: Range-wide genetic population structure of common pochard (Aythya ferina): a potentially important vector of highly pathogenic avian influenza viruses
Source: PubMed Central journal article supplement (PMC3287338; doi:10.1002/ece3.46), 2011-12

**Figure A2** Analyses with the program STRUCTURE v.2.3.1 provide no evidence of genetic substructure within (a) breeding or (b) wintering pochard. Shown are the means of the posterior probability  $\ln P(D)$  ( $\pm SD$ ) for different numbers of genetic groups ( $K$ ) and averaged over 10 runs per  $K$ .

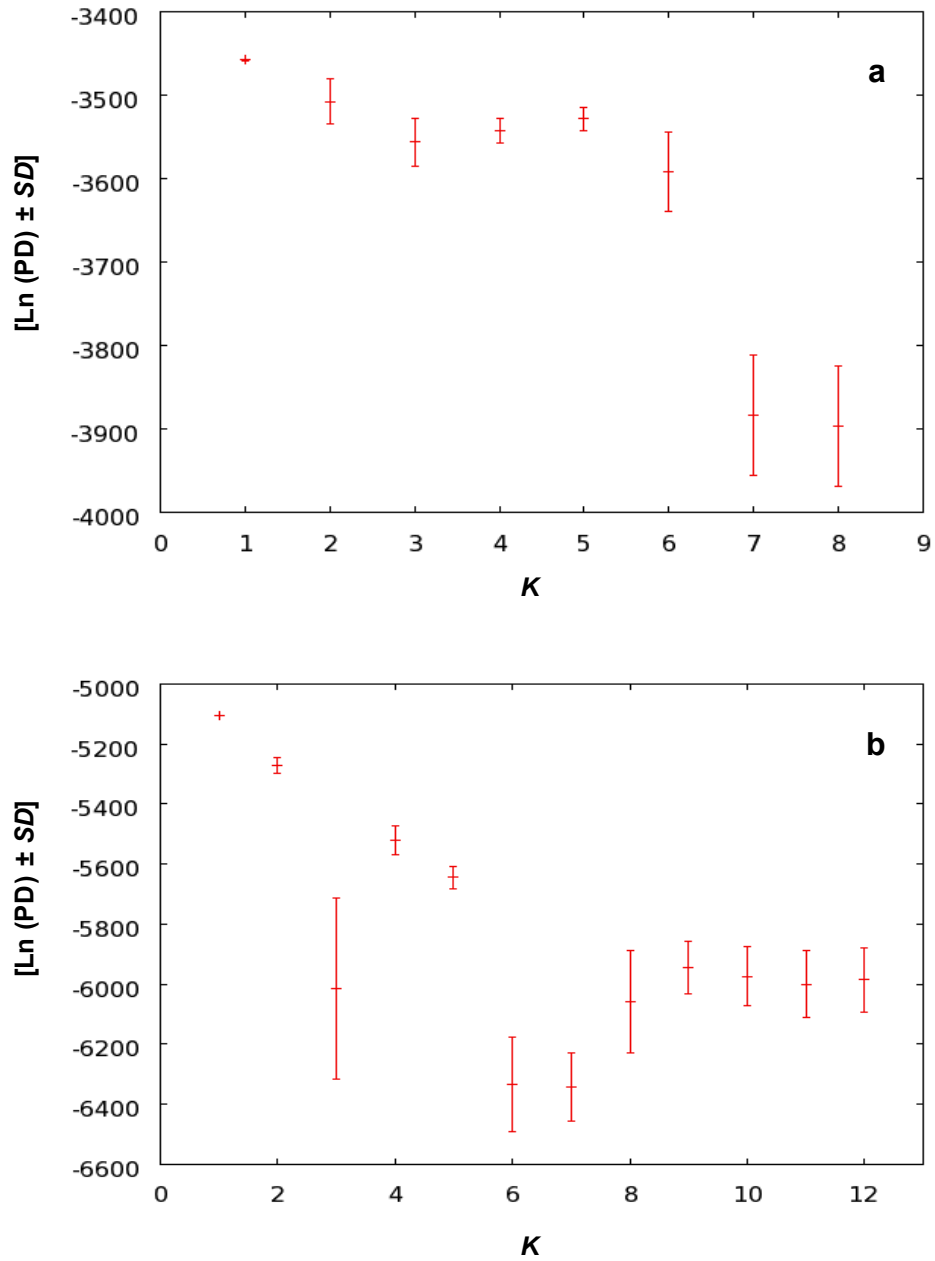

Supplement: ece30001-0529-SD2.pdf [file ece30001-0529-SD2.pdf]
